# Supplementary material for: Effects of Daqu Attributes on Distribution and Assembly Patterns of Microbial Communities and Their Metabolic Function of Artificial Pit Mud
Source: MDPI journal article supplement (doi:10.3390/foods11182922), 2022-09-19
Supplement: s1 [file s1]

## **Supplementary materials**

### **Effects of *Daqu* attributes on distribution and assembly patterns of microbial communities and their metabolic function of artificial pit mud**

**Yu Mu<sup>1</sup>, Jun Huang<sup>1</sup>, Rongqing Zhou<sup>1,2,\*</sup>, Suyi Zhang<sup>2,3</sup>, Hui Qin<sup>2,3</sup>, Hanlan Tang<sup>2,3</sup>, Qianglin Pan<sup>1</sup>, Huifang Tang<sup>1</sup>**

<sup>1</sup> College of Biomass Science and Engineering, Sichuan University, Chengdu 610065, China;

<sup>2</sup> National Engineering Research Center of Solid-State Manufacturing, Luzhou 646000, China;

<sup>3</sup> Luzhou Lao Jiao Co., Ltd., Luzhou 646699, China.

#### **\* The complete contact details of the corresponding author:**

Name: Rongqing Zhou;

E-mail: zhourqing@scu.edu.cn;

Phone: +86-28-85406149;

Fax: +86-28-85405237;

Mailing address: College of Biomass Science and Engineering, Sichuan University, Chengdu 610065, China.

**Table S1** The detailed information of fluorescently labeled oligo-probes.

| Probe/Stain | Sequence (5'-3')                   | Target                      |
|-------------|------------------------------------|-----------------------------|
| DAPI        | —                                  | Total microbes              |
| EUB338      | GCTGCCTCCCGTAGGAGT                 | Eubacteria                  |
| CLZ         | GGCTACCTTGTTACGACTTCACCCCA         | <i>Clostridium</i>          |
| KCLZ        | CCTGCACACCCTTTACGCCAGTAATTCCGGACAA | <i>Clostridium kluyveri</i> |
| ARCH915     | GTGCTCCCCCGCCAATTCCT               | Archaea                     |
| MSMX860     | GGCTCGCTTCACGGCTTCCCT              | <i>Methanosarcinales</i>    |
| MG1200b     | CRGATAATTCGGGGCATGCTG              | <i>Methanomicrobiales</i>   |
| MB311       | ACCTTGTCTCAGGTTCCATCTCC            | <i>Methanobacteriales</i>   |

**Table S2** Differences in core microbes of FPM and CPM based on fluorescence in situ hybridization ( $\times 10^7$  cells/g).

| Probe/Stain | FPM                   | CPM                   |
|-------------|-----------------------|-----------------------|
| DAPI        | 8724.00 $\pm$ 524.25  | 8045.47 $\pm$ 717.24  |
| EUB338      | 1393.90 $\pm$ 715.00b | 3354.70 $\pm$ 514.42a |
| CLZ         | 152.67 $\pm$ 43.32a   | 67.85 $\pm$ 11.11b    |
| KCLZ        | 34.90 $\pm$ 11.95a    | 10.91 $\pm$ 7.27b     |
| ARCH915     | 4232.11 $\pm$ 658.86a | 1380.82 $\pm$ 287.42b |
| MSMX860     | 2060.80 $\pm$ 557.44a | 455.10 $\pm$ 109.51b  |
| MG1200b     | 364.95 $\pm$ 144.71a  | 113.28 $\pm$ 14.06b   |
| MB311       | 12.12 $\pm$ 4.20a     | 0.00 $\pm$ 0.00b      |

Note: Different letters in the same row indicate significant differences in *t*-test ( $p < 0.05$ ).

**Table S3** Sequencing results of all artificial pit mud samples.

| Sample | Bacteria                         |                                     |                        | Fungi                            |                                     |                        |
|--------|----------------------------------|-------------------------------------|------------------------|----------------------------------|-------------------------------------|------------------------|
|        | Effective sequences <sup>a</sup> | High-quality sequences <sup>b</sup> | Ratio (%) <sup>c</sup> | Effective sequences <sup>a</sup> | High-quality sequences <sup>b</sup> | Ratio (%) <sup>c</sup> |
| FPM1   | 107283                           | 86984                               | 81.08                  | 118560                           | 115921                              | 81.22                  |
| FPM2   | 108118                           | 92573                               | 85.62                  | 124416                           | 120940                              | 83.56                  |
| FPM3   | 101193                           | 72564                               | 71.71                  | 116659                           | 112408                              | 82.33                  |
| FPM4   | 113345                           | 98689                               | 87.07                  | 117954                           | 116365                              | 83.08                  |
| FPM5   | 111563                           | 96213                               | 86.24                  | 119358                           | 118731                              | 86.15                  |
| CPM1   | 98198                            | 82040                               | 83.55                  | 122058                           | 120745                              | 84.39                  |
| CPM2   | 95112                            | 83755                               | 88.06                  | 124318                           | 122058                              | 82.81                  |
| CPM3   | 84529                            | 65672                               | 77.69                  | 79418                            | 75653                               | 69.62                  |
| CPM4   | 92895                            | 90906                               | 97.86                  | 122233                           | 121424                              | 86.75                  |
| CPM5   | 98683                            | 91109                               | 92.32                  | 115368                           | 110471                              | 81.65                  |

<sup>a</sup> The effective sequences were obtained by removing low-quality tags.

<sup>b</sup> The high-quality sequences were obtained by further removing chimeras.

<sup>c</sup> The ratio of high-quality sequences in effective sequences

**Table S4** The detail of volatile compounds detected in CPM and FPM.

| Compounds name          | No. CAS    | Concentration (mg/kg) |        |       |        |        |        |        |        |        |        | <i>t</i> -test  |
|-------------------------|------------|-----------------------|--------|-------|--------|--------|--------|--------|--------|--------|--------|-----------------|
|                         |            | CPM1                  | CPM2   | CPM3  | CPM4   | CPM5   | FPM1   | FPM2   | FPM3   | FPM4   | FPM5   | <i>p</i> _value |
| <b>Esters</b>           |            |                       |        |       |        |        |        |        |        |        |        |                 |
| Ethyl butyrate          | 105-54-4   | 0.90                  | 0.34   | 0.61  | 0.56   | 0.23   | 3.69   | 1.33   | 1.22   | 1.33   | 2.50   | 0.034           |
| Propyl butyrate         | 105-66-8   | 0.00                  | 0.00   | 0.00  | 0.00   | 0.00   | 0.12   | 0.06   | 0.06   | 0.06   | 0.14   | 0.007           |
| Ethyl valerate          | 539-82-2   | 2.51                  | 0.97   | 0.99  | 1.63   | 0.80   | 9.52   | 2.65   | 3.48   | 2.44   | 3.83   | —               |
| Methyl hexanoate        | 106-70-7   | 0.86                  | 0.73   | 1.28  | 1.49   | 0.85   | 1.49   | 1.90   | 1.11   | 1.23   | 2.09   | —               |
| Ethyl 4-methylvalerate  | 25415-67-2 | 0.14                  | 0.06   | 0.08  | 0.06   | 0.03   | 0.17   | 0.08   | 0.08   | 0.06   | 0.14   | —               |
| Butyl butyrate          | 109-21-7   | 0.60                  | 0.17   | 0.07  | 0.20   | 0.05   | 1.24   | 1.09   | 0.99   | 1.05   | 2.61   | 0.006           |
| Propyl valerate         | 141-06-0   | 0.00                  | 0.00   | 0.00  | 0.00   | 0.00   | 0.24   | 0.06   | 0.02   | 0.06   | 0.00   | —               |
| Ethyl hexanoate         | 123-66-0   | 110.71                | 106.83 | 91.89 | 103.00 | 100.73 | 130.23 | 153.11 | 178.26 | 125.12 | 209.21 | 0.019           |
| Isoamyl butyrate        | 106-27-4   | 0.36                  | 0.21   | 0.11  | 0.09   | 0.09   | 0.30   | 0.15   | 0.19   | 0.19   | 0.38   | —               |
| Hexyl acetate           | 142-92-7   | 0.07                  | 0.21   | 0.08  | 0.07   | 0.05   | 0.16   | 0.13   | 0.08   | 0.08   | 0.16   | —               |
| Methyl heptanoate       | 106-73-0   | 0.04                  | 0.09   | 0.08  | 0.11   | 0.09   | 0.47   | 0.09   | 0.05   | 0.05   | 0.09   | —               |
| Ethyl 5-methylhexanoate | 10236-10-9 | 0.10                  | 0.07   | 0.05  | 0.06   | 0.07   | 0.25   | 0.05   | 0.06   | 0.03   | 0.07   | —               |
| Butyl valerate          | 591-68-4   | 0.78                  | 0.21   | 0.07  | 0.41   | 0.14   | 3.15   | 1.22   | 1.43   | 1.08   | 2.37   | 0.015           |
| Amyl butyrate           | 540-18-1   | 0.00                  | 0.00   | 0.00  | 0.00   | 0.00   | 0.80   | 0.00   | 0.00   | 0.00   | 0.00   | —               |
| Propyl hexanoate        | 626-77-7   | 0.00                  | 3.05   | 0.17  | 6.51   | 4.81   | 6.07   | 9.64   | 16.52  | 9.57   | 19.00  | 0.009           |
| Ethyl lactate           | 687-47-8   | 9.64                  | 6.21   | 5.65  | 8.16   | 4.81   | 1.83   | 0.00   | 0.00   | 0.00   | 0.25   | 0.001           |
| Ethyl heptanoate        | 106-30-9   | 19.36                 | 17.80  | 6.76  | 15.09  | 19.76  | 32.74  | 12.11  | 15.52  | 8.53   | 16.62  | —               |
| Isobutyl hexanoate      | 105-79-3   | 2.27                  | 0.92   | 0.61  | 0.90   | 1.22   | 0.83   | 1.15   | 1.94   | 1.70   | 3.20   | —               |
| Isopentyl valerate      | 2050-09-1  | 0.30                  | 0.16   | 3.84  | 0.15   | 0.15   | 0.48   | 0.18   | 0.26   | 0.17   | 0.34   | —               |
| Butyl hexanoate         | 626-82-4   | 49.31                 | 13.93  | 7.51  | 24.03  | 13.14  | 40.42  | 73.58  | 104.36 | 78.39  | 135.97 | 0.006           |
| Hexyl butyrate          | 2639-63-6  | 1.61                  | 1.59   | 0.67  | 0.90   | 0.69   | 2.09   | 1.82   | 1.25   | 1.18   | 0.39   | —               |

|                                   |            |       |       |       |       |       |       |       |        |       |       |       |
|-----------------------------------|------------|-------|-------|-------|-------|-------|-------|-------|--------|-------|-------|-------|
| Propan-2-yl heptanoate            | 34997-46-1 | 0.45  | 0.23  | 0.06  | 0.37  | 0.24  | 0.84  | 0.33  | 0.68   | 0.35  | 0.59  | 0.041 |
| Ethyl caprylate                   | 106-32-1   | 28.91 | 40.62 | 13.69 | 27.77 | 33.80 | 25.89 | 10.88 | 15.45  | 9.12  | 17.40 | 0.038 |
| Hexyl isovalerate                 | 10032-13-0 | 0.00  | 0.00  | 0.00  | 0.00  | 0.00  | 0.17  | 0.00  | 0.00   | 0.00  | 0.00  | —     |
| Isobutyl heptanoate               | 7779-80-8  | 0.07  | 0.05  | 0.03  | 0.05  | 0.09  | 0.13  | 0.00  | 0.00   | 0.00  | 0.07  | —     |
| Isoamyl hexanoate                 | 2198-61-0  | 17.82 | 10.20 | 9.46  | 11.35 | 14.77 | 7.01  | 10.02 | 18.44  | 12.27 | 18.70 | —     |
| Pentyl hexanoate                  | 540-07-8   | 12.40 | 8.15  | 3.81  | 10.32 | 8.34  | 28.43 | 23.04 | 30.51  | 17.20 | 26.70 | 0.001 |
| Heptyl butyrate                   | 5870-93-9  | 0.00  | 0.00  | 0.00  | 0.00  | 0.00  | 0.43  | 0.00  | 0.00   | 0.00  | 0.00  | —     |
| Propyl octanoate                  | 624-13-5   | 0.51  | 0.48  | 0.00  | 0.79  | 0.48  | 0.63  | 0.28  | 0.69   | 0.30  | 0.55  | —     |
| Butan-2-yl octanoate              | 5458-61-7  | 0.00  | 0.00  | 0.00  | 0.00  | 0.00  | 0.18  | 0.00  | 0.00   | 0.00  | 0.00  | —     |
| Ethyl nonanoate                   | 123-29-5   | 0.16  | 0.36  | 0.15  | 0.18  | 0.29  | 0.79  | 0.07  | 0.11   | 0.05  | 0.08  | —     |
| Isoamyl lactate                   | 19329-89-6 | 0.00  | 0.00  | 0.24  | 0.00  | 0.06  | 0.00  | 0.00  | 0.00   | 0.00  | 0.00  | —     |
| Isoamyl heptanoate                | 109-25-1   | 0.51  | 0.52  | 0.28  | 0.53  | 0.91  | 0.82  | 0.20  | 0.60   | 0.25  | 0.39  | —     |
| 4-Methylpentyl 4-methylpentanoate | 35852-42-7 | 0.21  | 0.09  | 0.12  | 0.15  | 0.16  | 0.31  | 0.00  | 0.00   | 0.12  | 0.00  | —     |
| 1-Methylhexyl hexanoate           | 6624-58-4  | 0.66  | 0.39  | 0.16  | 0.83  | 0.59  | 0.00  | 0.00  | 0.00   | 0.00  | 0.00  | 0.010 |
| Pentan-2-yl octanoate             | 55193-30-1 | 0.21  | 0.13  | 0.11  | 0.16  | 0.08  | 0.00  | 0.00  | 0.00   | 0.00  | 0.00  | 0.003 |
| Hexyl hexanoate                   | 6378-65-0  | 52.14 | 59.00 | 33.98 | 51.07 | 42.39 | 48.94 | 80.13 | 116.08 | 65.30 | 83.95 | 0.031 |
| Butyl caprylate                   | 589-75-3   | 1.79  | 1.16  | 0.34  | 2.40  | 1.30  | 1.37  | 1.31  | 2.63   | 1.57  | 2.41  | —     |
| Ethyl caprate                     | 110-38-3   | 2.10  | 1.28  | 1.99  | 2.82  | 2.04  | 4.41  | 3.14  | 3.33   | 2.00  | 2.50  | —     |
| Ethyl benzoate                    | 93-89-0    | 0.23  | 0.33  | 0.03  | 0.04  | 0.02  | 0.16  | 0.14  | 0.99   | 0.29  | 0.46  | —     |
| Diethyl succinate                 | 123-25-1   | 0.19  | 0.11  | 0.20  | 0.24  | 0.20  | 0.21  | 0.19  | 0.30   | 0.24  | 0.28  | —     |
| Isoamyl octanoate                 | 2035-99-6  | 0.62  | 0.71  | 0.39  | 0.80  | 0.89  | 0.00  | 0.00  | 0.00   | 0.00  | 0.00  | 0.001 |
| Butyl heptanoate                  | 5454-28-4  | 2.71  | 5.87  | 1.77  | 3.88  | 4.68  | 9.61  | 3.15  | 5.83   | 2.44  | 2.92  | —     |
| Ethyl undecanoate                 | 627-90-7   | 0.00  | 0.00  | 0.00  | 0.00  | 0.00  | 0.22  | 0.00  | 0.00   | 0.00  | 0.00  | —     |
| Ethyl phenylacetate               | 101-97-3   | 3.66  | 2.45  | 3.11  | 3.85  | 2.16  | 6.36  | 3.22  | 5.43   | 2.20  | 2.88  | —     |
| Furfuryl hexanoate                | 39252-02-3 | 0.35  | 0.23  | 0.00  | 0.28  | 0.19  | 0.14  | 0.33  | 0.73   | 0.35  | 0.57  | —     |
| Ethyl laurate                     | 106-33-2   | 0.62  | 0.57  | 0.96  | 1.45  | 1.85  | 1.18  | 0.52  | 0.80   | 0.32  | 0.43  | —     |

|                             |            |       |       |       |       |       |       |       |        |       |       |       |
|-----------------------------|------------|-------|-------|-------|-------|-------|-------|-------|--------|-------|-------|-------|
| Ethyl 3-phenylpropionate    | 2021-28-5  | 8.37  | 5.06  | 8.17  | 9.15  | 5.72  | 12.07 | 8.16  | 11.50  | 6.51  | 8.85  | —     |
| Isobutyl phenylacetate      | 102-13-6   | 0.40  | 0.25  | 0.00  | 0.48  | 0.00  | 0.77  | 0.63  | 0.79   | 0.45  | 0.51  | 0.010 |
| Phenethyl butyrate          | 103-52-6   | 0.33  | 0.24  | 0.00  | 0.34  | 0.18  | 0.38  | 0.34  | 0.45   | 0.36  | 0.41  | 0.031 |
| Phenethyl pentanoate        | 7460-74-4  | 0.00  | 0.00  | 0.00  | 0.00  | 0.00  | 0.45  | 0.00  | 0.00   | 0.00  | 0.34  | —     |
| Isobutyl 3-phenylpropionate | 28048-94-4 | 0.67  | 0.29  | 0.16  | 0.77  | 0.36  | 0.86  | 1.07  | 1.69   | 1.01  | 1.29  | 0.004 |
| Ethyl myristate             | 124-06-1   | 0.92  | 0.58  | 1.43  | 1.98  | 1.14  | 0.76  | 0.77  | 1.25   | 0.94  | 0.89  | —     |
| Hexyl 2-phenylacetate       | 5421-17-0  | 0.00  | 0.00  | 0.00  | 0.00  | 0.00  | 0.36  | 0.00  | 0.00   | 0.00  | 0.00  | —     |
| 2-Phenethyl hexanoate       | 6290-37-5  | 3.72  | 2.48  | 1.95  | 4.26  | 4.86  | 1.80  | 3.80  | 7.52   | 4.45  | 4.98  | —     |
| Ethyl pentadecanoate        | 41114-00-5 | 0.27  | 0.22  | 0.40  | 0.49  | 0.33  | 0.52  | 0.30  | 0.57   | 0.33  | 0.28  | —     |
| (Z)-Ethyl pentadec-9-enoate | 56219-09-1 | 0.00  | 0.08  | 0.11  | 0.11  | 0.09  | 0.07  | 0.00  | 0.00   | 0.00  | 0.00  | 0.032 |
| Diethyl azelate             | 624-17-9   | 0.13  | 0.10  | 0.19  | 0.19  | 0.12  | 0.08  | 0.09  | 0.22   | 0.14  | 0.14  | —     |
| Methyl palmitate            | 112-39-0   | 0.00  | 0.10  | 0.16  | 0.17  | 0.10  | 0.23  | 0.16  | 0.18   | 0.12  | 0.15  | —     |
| Ethyl hexadecanoate         | 628-97-7   | 15.35 | 11.22 | 16.34 | 16.73 | 14.49 | 11.62 | 10.54 | 15.25  | 10.76 | 9.91  | 0.047 |
| Ethyl 9-hexadecenoate       | 54546-22-4 | 1.19  | 0.76  | 1.07  | 1.63  | 1.01  | 0.00  | 0.00  | 0.00   | 0.00  | 0.00  | 0.001 |
| Ethyl (E)-octadec-9-enoate  | 6114-18-7  | 6.59  | 5.06  | 6.64  | 6.30  | 5.98  | 3.16  | 2.84  | 2.93   | 2.47  | 1.96  | 0     |
| Ethyl linoleate             | 7619-8-1   | 6.92  | 5.22  | 8.60  | 6.97  | 6.81  | 3.82  | 2.45  | 2.68   | 2.17  | 1.97  | 0     |
| <b>Acids</b>                |            |       |       |       |       |       |       |       |        |       |       |       |
| Acetic acid                 | 64-19-7    | 1.25  | 1.67  | 1.83  | 1.93  | 1.23  | 2.54  | 2.73  | 2.76   | 2.71  | 2.24  | 0.009 |
| Propanoic acid              | 79-09-4    | 0.89  | 0.97  | 1.12  | 2.31  | 0.76  | 0.54  | 0.18  | 0.30   | 0.19  | 0.36  | 0.009 |
| 2-Methyl-propanoic acid     | 74381-40-1 | 0.32  | 0.29  | 0.29  | 0.34  | 0.16  | 0.71  | 0.52  | 1.02   | 0.63  | 1.08  | 0.008 |
| Butanoic acid               | 107-92-6   | 7.28  | 7.94  | 8.01  | 11.95 | 4.43  | 13.11 | 15.52 | 22.68  | 15.17 | 21.46 | 0.003 |
| Pentanoic acid              | 109-52-4   | 4.67  | 5.28  | 3.53  | 6.57  | 3.49  | 13.69 | 8.88  | 15.15  | 6.70  | 8.68  | 0.018 |
| 4-Methyl-pentanoic acid     | 646-07-1   | 0.19  | 0.20  | 0.24  | 0.19  | 0.14  | 0.26  | 0.18  | 0.38   | 0.17  | 0.24  | —     |
| Hexanoic acid               | 142-62-1   | 66.21 | 65.36 | 63.87 | 80.34 | 67.00 | 50.99 | 84.95 | 124.27 | 66.16 | 79.10 | —     |
| Heptanoic acid              | 111-14-8   | 10.62 | 24.64 | 10.65 | 18.71 | 20.76 | 19.37 | 11.63 | 22.19  | 9.24  | 10.82 | —     |
| Octanoic acid               | 124-07-2   | 12.31 | 48.66 | 12.25 | 23.73 | 24.48 | 12.71 | 7.64  | 15.53  | 6.83  | 8.95  | —     |

|                         |            |      |      |       |      |      |      |      |       |      |      |       |
|-------------------------|------------|------|------|-------|------|------|------|------|-------|------|------|-------|
| Nonanoic acid           | 112-05-0   | 0.00 | 0.89 | 0.00  | 0.00 | 0.00 | 0.00 | 0.00 | 0.00  | 0.00 | 0.00 | —     |
| <b>Alcohols</b>         |            |      |      |       |      |      |      |      |       |      |      |       |
| Ethanol                 | 64-17-5    | 4.95 | 4.27 | 13.18 | 8.26 | 7.12 | 7.91 | 7.27 | 12.43 | 8.50 | 7.38 | —     |
| 2-Pentanol              | 6032-29-7  | 0.08 | 0.07 | 0.07  | 0.04 | 0.00 | 0.03 | 0.07 | 0.07  | 0.06 | 0.07 | —     |
| 1-Butanol               | 71-36-3    | 0.18 | 0.13 | 0.31  | 0.83 | 0.00 | 0.50 | 1.09 | 1.73  | 1.20 | 1.83 | 0.008 |
| 3-Methyl-1-butanol      | 123-51-3   | 0.18 | 0.17 | 0.39  | 0.26 | 0.30 | 0.16 | 0.16 | 0.23  | 0.20 | 0.23 | —     |
| 1-Hexanol               | 111-27-3   | 0.96 | 1.61 | 1.93  | 1.23 | 1.05 | 1.50 | 2.13 | 2.13  | 1.50 | 2.22 | —     |
| 2,3-Butanediol          | 19132-06-0 | 0.00 | 0.00 | 0.00  | 0.00 | 0.00 | 0.30 | 0.00 | 0.24  | 0.10 | 0.71 | —     |
| Phenylethyl Alcohol     | 60-12-8    | 0.55 | 0.43 | 0.83  | 0.95 | 1.13 | 0.38 | 0.57 | 0.57  | 0.36 | 0.36 | 0.043 |
| <b>Phenols</b>          |            |      |      |       |      |      |      |      |       |      |      |       |
| 4-Ethylguaiacol         | 2785-89-9  | 0.25 | 0.20 | 0.30  | 0.29 | 0.58 | 0.14 | 0.17 | 0.20  | 0.11 | 0.13 | 0.034 |
| p-Cresol                | 106-44-5   | 1.71 | 4.21 | 3.69  | 0.97 | 1.41 | 2.78 | 1.76 | 0.94  | 0.70 | 0.83 | —     |
| <b>Others</b>           |            |      |      |       |      |      |      |      |       |      |      |       |
| Dimethyl trisulfide     | 3658-80-8  | 0.00 | 0.00 | 0.00  | 0.00 | 0.00 | 0.05 | 0.05 | 0.00  | 0.04 | 0.08 | 0.009 |
| Hexanoate anhydride     | 2051-49-2  | 3.58 | 2.17 | 1.98  | 3.90 | 2.72 | 1.20 | 2.88 | 6.63  | 2.51 | 3.46 | —     |
| $\gamma$ -Nonanolactone | 104-61-0   | 0.16 | 0.14 | 0.21  | 0.27 | 0.16 | 0.11 | 0.19 | 0.24  | 0.14 | 0.14 | —     |

Note: “—” represents that there is no significant difference in the concentration of compounds between CPM and FPM ( $t$ -test,  $p > 0.05$ ).



**Table S5** The abundance of functional genes encoding for key enzymes involved in substrate utilization and product formation in bacterial communities.

| Substrate utilization | Function description                      | Enzymes      | Enzymatic abundance/(per million EC) |         |         |         |         |         |         |         |         |         |
|-----------------------|-------------------------------------------|--------------|--------------------------------------|---------|---------|---------|---------|---------|---------|---------|---------|---------|
|                       |                                           |              | FPM1                                 | FPM2    | FPM3    | FPM4    | FPM5    | CPM1    | CPM2    | CPM3    | CPM4    | CPM5    |
| Lactic acid           | L-lactate dehydrogenase (cytochrome)      | EC:1.1.2.3   | 348.02                               | 752.00  | 356.43  | 604.75  | 684.84  | 284.66  | 277.99  | 105.48  | 93.95   | 557.05  |
|                       | D-lactate dehydrogenase (cytochrome)      | EC:1.1.2.4   | 62.91                                | 45.77   | 93.72   | 60.39   | 97.82   | 23.76   | 37.40   | 11.07   | 10.33   | 66.41   |
|                       | Lactate 2-monooxygenase                   | EC:1.13.12.4 | 4.42                                 | 1.13    | 6.42    | 1.96    | 4.63    | 0.68    | 0.02    | 0.35    | 0.00    | 0.93    |
|                       | L-lactate dehydrogenase                   | EC:1.1.1.27  | 668.96                               | 567.66  | 1270.88 | 614.76  | 670.31  | 2888.81 | 3575.46 | 3129.23 | 6179.44 | 2964.50 |
| Glucose               | Hexokinase                                | EC:2.7.1.1   | 11.92                                | 5.44    | 33.72   | 23.21   | 15.96   | 24.00   | 30.79   | 74.22   | 0.69    | 1.96    |
|                       | Glucokinase                               | EC:2.7.1.2   | 1593.98                              | 1260.15 | 1816.14 | 1353.59 | 1170.57 | 1817.82 | 1837.74 | 2187.93 | 2173.30 | 1491.91 |
|                       | Polyphosphate--glucose phosphotransferase | EC:2.7.1.63  | 72.96                                | 38.64   | 67.06   | 54.67   | 244.55  | 23.68   | 59.30   | 11.50   | 29.90   | 186.65  |
|                       | ADP-specific phosphofructokinase          | EC:2.7.1.146 | 0.55                                 | 0.89    | 4.85    | 3.25    | 2.35    | 3.62    | 1.86    | 10.82   | 0.00    | 0.00    |
| Ethanol               | Alcohol dehydrogenase                     | EC:1.1.1.1   | 2270.85                              | 2524.85 | 2668.90 | 2274.71 | 2305.00 | 3046.61 | 3324.09 | 3095.68 | 4367.86 | 3330.12 |
|                       | Alcohol dehydrogenase (NADP(+))           | EC:1.1.1.2   | 0.08                                 | 0.67    | 0.88    | 0.63    | 0.05    | 0.36    | 0.09    | 0.84    | 0.00    | 0.00    |
| Acetic acid           | Acetate--CoA ligase                       | EC:6.2.1.1   | 1147.33                              | 1257.30 | 917.11  | 1250.65 | 1785.85 | 557.44  | 631.20  | 394.91  | 213.84  | 1319.50 |
| -----                 |                                           |              |                                      |         |         |         |         |         |         |         |         |         |
| Product formation     |                                           |              |                                      |         |         |         |         |         |         |         |         |         |
| Lactic acid           | D-lactate dehydrogenase                   | EC:1.1.1.28  | 554.20                               | 488.76  | 818.77  | 470.25  | 442.92  | 1981.62 | 2398.23 | 2048.53 | 4105.54 | 1961.69 |
| Acetic acid           | Aldehyde dehydrogenase (NAD(P)(+))        | EC:1.2.1.5   | 2.85                                 | 0.01    | 2.14    | 0.68    | 0.78    | 1.40    | 0.59    | 1.47    | 0.19    | 1.18    |
|                       | Aldehyde dehydrogenase (NAD(+))           | EC:1.2.1.3   | 1035.42                              | 966.45  | 1160.23 | 994.02  | 1550.07 | 530.23  | 652.46  | 494.25  | 187.08  | 1115.48 |
|                       | Acetate--CoA ligase (ADP-forming)         | EC:6.2.1.13  | 6.24                                 | 0.07    | 2.25    | 0.63    | 0.03    | 2.06    | 0.67    | 2.33    | 0.00    | 0.39    |
| Butyric acid          | Acetyl-CoA C-acetyltransferase            | EC:2.3.1.9   | 2371.16                              | 2766.36 | 2240.43 | 2575.36 | 3167.91 | 1947.91 | 2367.49 | 1601.48 | 2453.47 | 3332.50 |
|                       | 3-hydroxybutyryl-CoA dehydrogenase        | EC:1.1.1.157 | 1222.08                              | 1482.82 | 1176.85 | 1320.38 | 1468.05 | 610.30  | 660.68  | 439.79  | 204.51  | 1126.62 |
|                       | 3-hydroxybutyryl-CoA dehydratase          | EC:4.2.1.55  | 41.21                                | 72.89   | 170.20  | 87.88   | 60.40   | 66.04   | 43.67   | 198.00  | 4.76    | 17.84   |
|                       | Butyrate kinase                           | EC:2.7.2.7   | 401.65                               | 229.26  | 426.94  | 258.16  | 298.22  | 327.74  | 231.69  | 323.01  | 25.48   | 80.97   |

|               |                                    |              |         |         |         |         |         |         |         |         |         |         |
|---------------|------------------------------------|--------------|---------|---------|---------|---------|---------|---------|---------|---------|---------|---------|
| Hexanoic acid | Acetate CoA-transferase            | EC:2.8.3.8   | 448.84  | 251.72  | 486.12  | 247.82  | 152.96  | 256.50  | 232.37  | 235.45  | 27.18   | 79.84   |
|               | Phosphate butyryltransferase       | EC:2.3.1.19  | 338.58  | 186.62  | 374.50  | 223.07  | 273.23  | 260.23  | 179.88  | 253.64  | 20.12   | 68.35   |
|               | Acetyl-CoA C-acetyltransferase     | EC:2.3.1.9   | 2371.16 | 2766.36 | 2240.43 | 2575.36 | 3167.91 | 1947.91 | 2367.49 | 1601.48 | 2453.47 | 3332.50 |
|               | 3-hydroxybutyryl-CoA dehydrogenase | EC:1.1.1.157 | 1222.08 | 1482.82 | 1176.85 | 1320.38 | 1468.05 | 610.30  | 660.68  | 439.79  | 204.51  | 1126.62 |
|               | 3-hydroxybutyryl-CoA dehydratase   | EC:4.2.1.55  | 41.21   | 72.89   | 170.20  | 87.88   | 60.40   | 66.04   | 43.67   | 198.00  | 4.76    | 17.84   |
|               | 3-hydroxyacyl-CoA dehydrogenase    | EC:1.1.1.35  | 769.73  | 1119.78 | 633.32  | 981.99  | 922.82  | 423.15  | 411.94  | 195.40  | 146.38  | 778.98  |
|               | Acyl-CoA hydrolase                 | EC:3.1.2.20  | 2.73    | 1.91    | 5.08    | 3.22    | 5.14    | 0.98    | 1.83    | 0.75    | 0.32    | 2.76    |

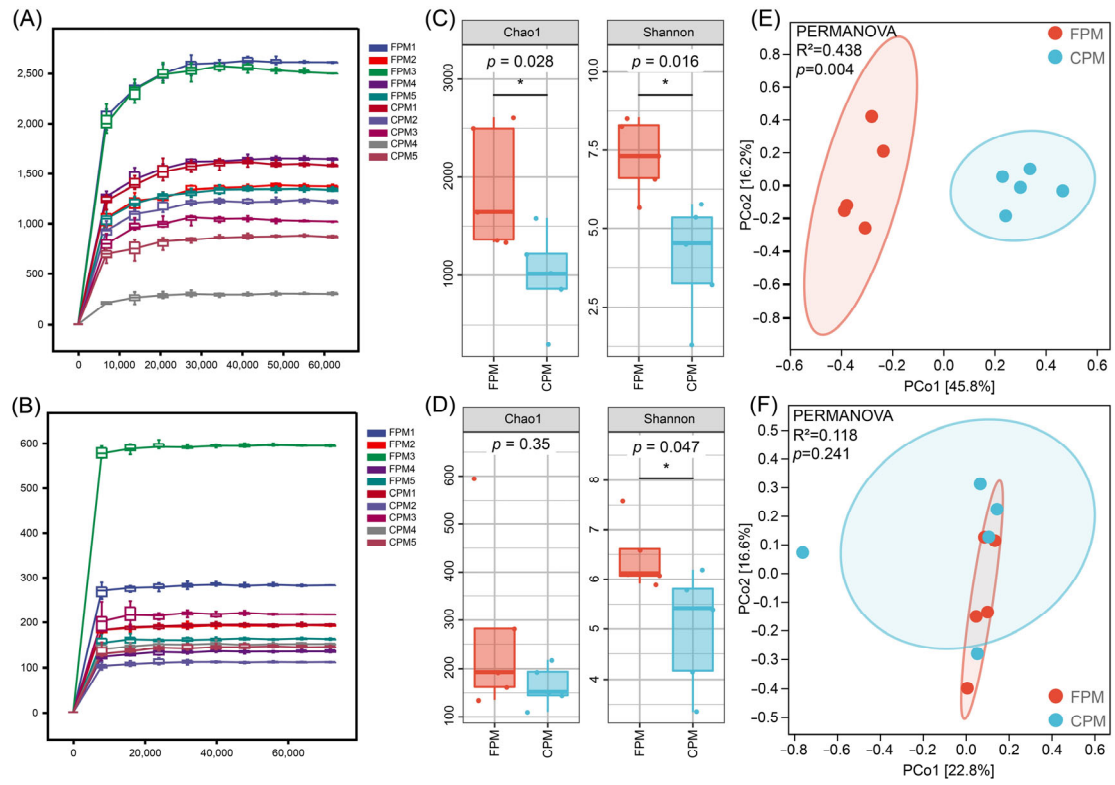

**Figure S1** Differences in rarefaction curves (A, bacteria; B, fungi),  $\alpha$ -diversity (C, bacteria; D, fungi) and  $\beta$ -diversity (E, bacteria; F, fungi) of microbial community between FPM and CPM.

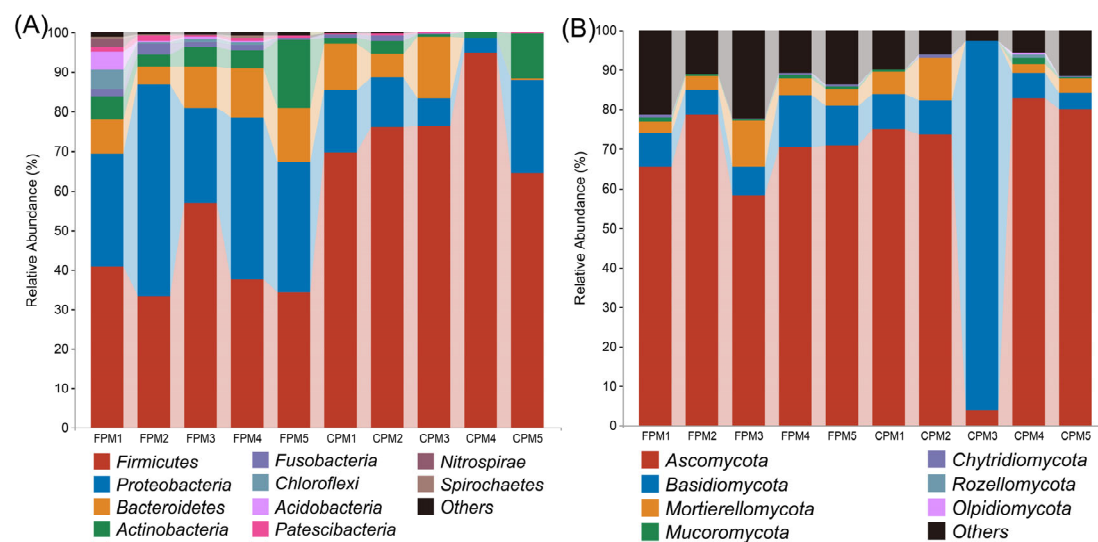

**Figure S2** The composition of microbial community at the phylum level. (A) bacteria; (B) fungi.

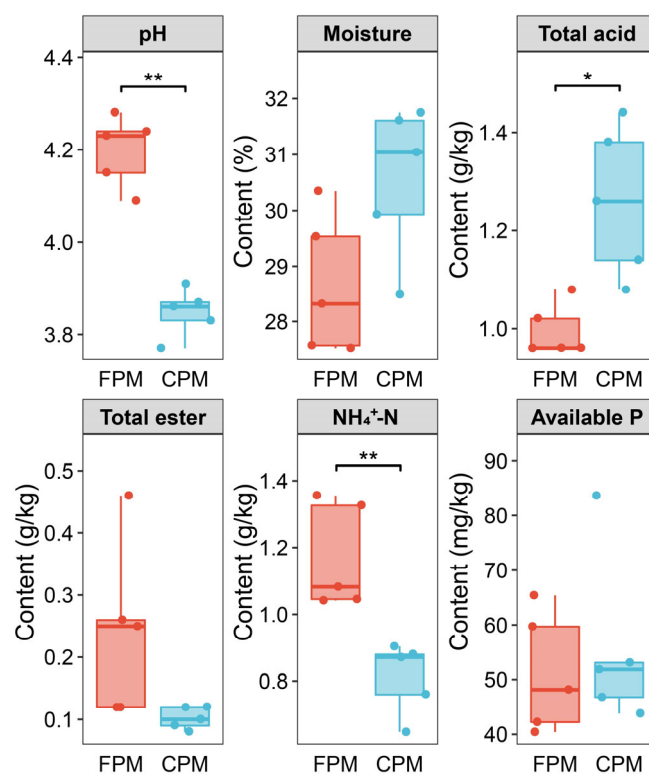

**Figure S3** Variations in physicochemical parameters between FPM and CPM.

Significant values based on *t*-test are shown as: \**p* < 0.05, \*\**p* < 0.01.

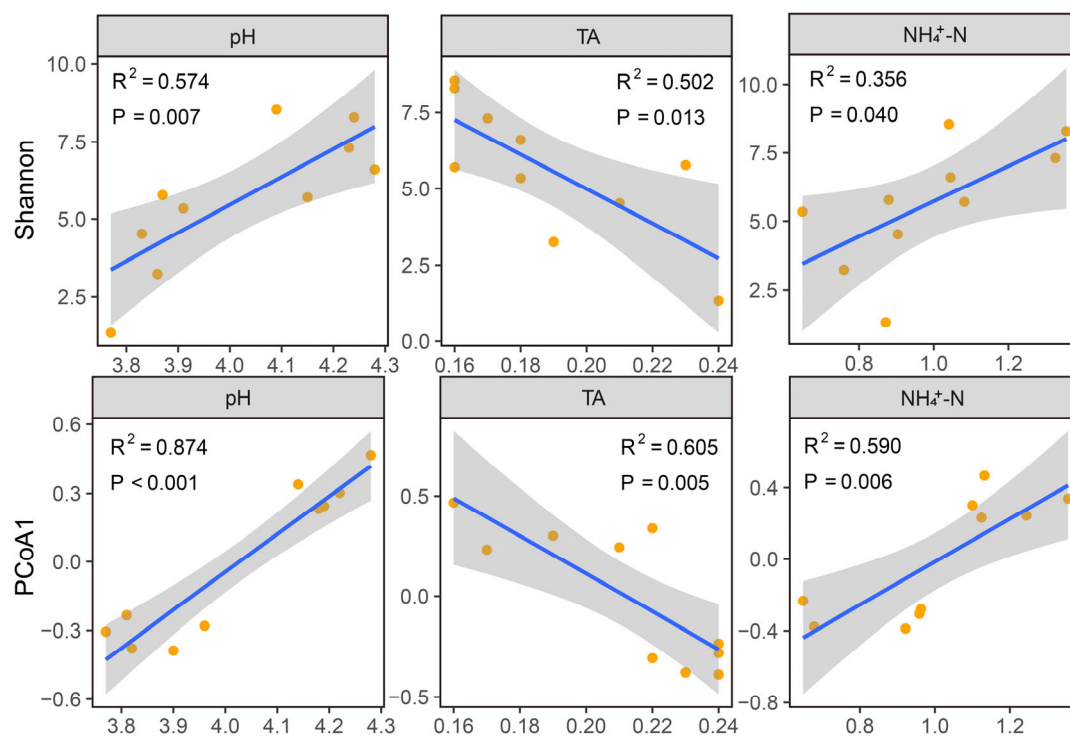

**Figure S4** Linear regression analysis between potential driving factors and  $\alpha/\beta$ -diversity of bacterial community.
